# Supplementary material for: Slit Guidance Ligand 3 (SLIT3) Loaded in Hydrogel Microparticles Enhances the Tendon-Bone Healing through Promotion of Type-H Vessel Formation: An Experimental Study in Mice
Source: MDPI journal article supplement (doi:10.3390/ijms241713638), 2023-09-04
Supplement: s1 [file s1]

Table S1 Detailed information of the used materials in this study

| <i>Names of Materials</i>                                                  | <i>Number</i>              | <i>Company</i>                                     |
|----------------------------------------------------------------------------|----------------------------|----------------------------------------------------|
| Sodium alginate(SA)                                                        | <i>CAS No. 9005-38-3</i>   | Aladdin Shanghai Reagent Co.,Ltd (Shanghai, China) |
| dithiothreitol (DTT)                                                       | <i>CAS No. 3483-12-3</i>   | Aladdin Shanghai Reagent Co.,Ltd (Shanghai, China) |
| 3, 3'-Dithiobis (propanoic dihydrazide) (DTP)                              | <i>CAS No. 50906-77-9</i>  | Frontier Scientific Co., Ltd, USA                  |
| <i>1-Ethyl-3-(3-dimethylaminopropyl) carbodiimide hydrochloride (EDCI)</i> | <i>CAS No. 25952-53-8</i>  | Damas-beta Co., Ltd (Shanghai, China)              |
| <i>2-Morpholinoethanesulphonic acid(MES)</i>                               | <i>CAS No. 4432-31-9</i>   | Aladdin Shanghai Reagent Co.,Ltd (Shanghai, China) |
| Poly (ethylene glycol) diacrylate (PEGDA) (average Mn 575)                 | <i>CAS No. 26570-48-9</i>  | Sigma-Aldrich Co., Ltd, Shanghai, China            |
| <i>2,2'-Azobis(2-methylpropionitrile) (AIBN)</i>                           | <i>CAS No. 78-67-1</i>     | Aladdin Shanghai Reagent Co.,Ltd (Shanghai, China) |
| Tetraethylthiuram <u>disulfide</u> (DS)                                    | <i>CAS No. 97-77-8</i>     | Aladdin Shanghai Reagent Co.,Ltd (Shanghai, China) |
| Fluorinert™ FC-40                                                          | <i>CAS No. 86508-42-1</i>  | 3M                                                 |
| 1H, 1H, 2H, 2H-perfluoro-1-octanol (PFO)                                   | <i>CAS No. 647-42-7</i>    | Bide Pharm Co., Ltd (Shanghai, China)              |
| Novec™ 7500                                                                | <i>CAS No. 297730-93-9</i> | 3M                                                 |
| Minimum Essential Medium $\alpha$ (MEM $\alpha$ )                          | <i>12571071</i>            | Gibco, USA                                         |
| fetal bovine serum (FBS)                                                   | <i>10099141</i>            | Gibco, USA                                         |
| counting kit-8(CCK8)                                                       | <i>HY-K0301</i>            | MCE, USA                                           |
| Live/Dead assay kit                                                        | <i>CA1630</i>              | Solarbio                                           |
| Slit3 Elisa kit                                                            | <i>SED353M</i>             | Cloud-Clone, China                                 |
| 4% paraformaldehyde                                                        | <i>BL539A</i>              | Biosharp, USA                                      |
| 8-0 suture                                                                 | <i>R831</i>                | Jinhuan, China                                     |
| sodium heparin                                                             | <i>9041-08-01</i>          | MACKLIN, China                                     |
| ethylenediaminetetraacetic acid (EDTA)                                     | <i>6381-92-6</i>           | MACKLIN, China                                     |
| optimum cutting temperature compound (OCT)                                 | <i>4583</i>                | TissueTek, USA                                     |
| Hematoxylin and Eosin dye                                                  | <i>PH0512</i>              | Phygene, China                                     |
| Safranin O/Fast Green                                                      | <i>RBG1036-200-2</i>       | Roles-Bio,                                         |
| antigen retrieval solution                                                 | <i>BL618A</i>              | Biosharp, USA                                      |
| bovine serum albumin (BSA)                                                 | <i>9048-46-8</i>           | Biofroxx, German                                   |
| Triton X-100                                                               | <i>9002-93-1</i>           | Sigma, USA                                         |
| DAPI                                                                       | <i>S2110</i>               | Solarbio, China                                    |
| Slit3 Elisa kit                                                            | <i>SED353M</i>             | Cloud-Clone, China                                 |
| 4% paraformaldehyde                                                        | <i>BL539A</i>              | Biosharp, USA                                      |
| 8-0 suture                                                                 | <i>R831</i>                | Jinhuan, China                                     |
| Endomucin antibody                                                         | <i>sc-65495</i>            | SANTA CRUZ, USA                                    |
| CD31 antibody                                                              | <i>ab28364</i>             | Abcam, USA                                         |

|                             |                |                     |
|-----------------------------|----------------|---------------------|
| anti-rat Alexa Fluor 488    | <i>4416</i>    | Cell signaling, USA |
| anti-rabbit Alexa Fluor 649 | <i>BS10034</i> | Bioworld, USA       |
| Slit3                       | <i>767804</i>  | Biolegend, USA      |
